# Supplementary material for: Risk of diabetic retinopathy and diabetic macular oedema with sodium–glucose cotransporter 2 inhibitors and glucagon-like peptide 1 receptor agonists in type 2 diabetes: a real-world data study from a global federated database
Source: Springer Nature journal article supplement (doi:10.1007/s00125-024-06132-5), 2024-04-08

## Electronic Supplementary Material

*Supplementary Material Table 1: Diabetic retinopathy/ DMO outcomes in the SGLT2i + insulin cohort vs control*

|                             | SGLT2i  | Control |
|-----------------------------|---------|---------|
| <b>Diabetic Retinopathy</b> |         |         |
| Number of patients          | 147,543 | 148,130 |
| Number of events            | 3,262   | 4,305   |
| Survival probability (%)    | 93.64   | 94.44   |
| Number of patients excluded | 6,995   | 6,408   |
| <b>Macular oedema</b>       |         |         |
| Number of patients          | 150,688 | 150,612 |
| Number of events            | 1,376   | 2,323   |
| Survival probability (%)    | 97.35   | 97.05   |
| Number of patients excluded | 3,850   | 3,926   |

*Supplementary Material Table 2: Diabetic Retinopathy/ DMO outcomes in the GLP1-ra + insulin cohort vs control*

|                             | GLP1-ra | Control |
|-----------------------------|---------|---------|
| <b>Diabetic Retinopathy</b> |         |         |
| Number of patients          | 173,723 | 174,727 |
| Number of events            | 6,119   | 5,374   |
| Survival probability (%)    | 92.37   | 94.39   |
| Number of patients excluded | 9,368   | 8,364   |
| <b>Macular Oedema</b>       |         |         |
| Number of patients          | 178,062 | 178,022 |
| Number of events            | 2,554   | 2,855   |
| Survival probability (%)    | 96.87   | 97.09   |
| Number of patients excluded | 5,029   | 5,069   |

*Supplementary Material Table 3: Diabetic Retinopathy/ DMO outcomes in the GLP1-ra + insulin vs SGLT2i + insulin cohorts.*

|                             | GLP1-ra | SGLT2i  |
|-----------------------------|---------|---------|
| <b>Diabetic Retinopathy</b> |         |         |
| Number of patients          | 130,378 | 130,388 |
| Number of events            | 4,981   | 3,307   |
| Survival probability (%)    | 91.57   | 93.08   |
| Number of patients excluded | 8,739   | 8,729   |
| <b>Macular Oedema</b>       |         |         |
| Number of patients          | 134,747 | 134,624 |
| Number of events            | 2,055   | 1,449   |
| Survival probability (%)    | 96.65   | 97.05   |
| Number of patients excluded | 4,370   | 4,493   |

*Supplementary Material Table 4: Heart failure/Hospitalisation/All-cause Mortality outcomes in the SGLT2i + insulin cohort vs control*

|                             | SGLT2i  | Control |
|-----------------------------|---------|---------|
| <b>Heart Failure</b>        |         |         |
| Number of patients          | 107,794 | 120,950 |
| Number of events            | 8,518   | 14,718  |
| Survival probability (%)    | 83.06   | 79.43   |
| Number of patients excluded | 46,744  | 33,588  |
| <b>Hospitalisation</b>      |         |         |
| Number of patients          | 154,538 | 154,538 |
| Number of events            | 47,864  | 70,189  |
| Survival probability (%)    | 48.77   | 39.51   |
| <b>All-cause mortality</b>  |         |         |
| Number of patients          | 152,815 | 152,057 |
| Number of events            | 12,151  | 30,152  |
| Survival probability (%)    | 81.20   | 69.12   |
| Number of patients excluded | 1,723   | 2,481   |

*Supplementary Material Table 5: Heart failure/Hospitalisation/All-cause Mortality outcomes in the GLP1-ra + insulin cohort vs control*

|                             | GLP1-ra | Control |
|-----------------------------|---------|---------|
| <b>Heart Failure</b>        |         |         |
| Number of patients          | 163,143 | 156,539 |
| Number of events            | 10,100  | 15,356  |
| Survival probability (%)    | 87.14   | 83.74   |
| Number of patients excluded | 19,948  | 26,552  |
| <b>Hospitalisation</b>      |         |         |
| Number of patients          | 183,091 | 183,091 |
| Number of events            | 46,789  | 76,859  |
| Survival probability (%)    | 58.60   | 44.06   |
| <b>All-cause mortality</b>  |         |         |
| Number of patients          | 181,231 | 180,746 |
| Number of events            | 11,005  | 26,775  |
| Survival probability (%)    | 86.65   | 76.64   |
| Number of patients excluded | 1,860   | 2,345   |

*Supplementary Material Table 6: E-values for the primary outcomes*

|                    | Diabetic Retinopathy | DMO          |
|--------------------|----------------------|--------------|
|                    | E-value (CI)         | E-value (CI) |
| SGLT2i vs control  | 1.36 (1.19)          | 1.68 (1.49)  |
| GLP1-ra vs control | 1.94 (1.83)          | n/a          |
| GLP1-ra vs SGLT2i  | 1.7 (1.57)           | 1.51 (1.3)   |

# Supplementary Material Figure 1: Propensity Score Matching graphs

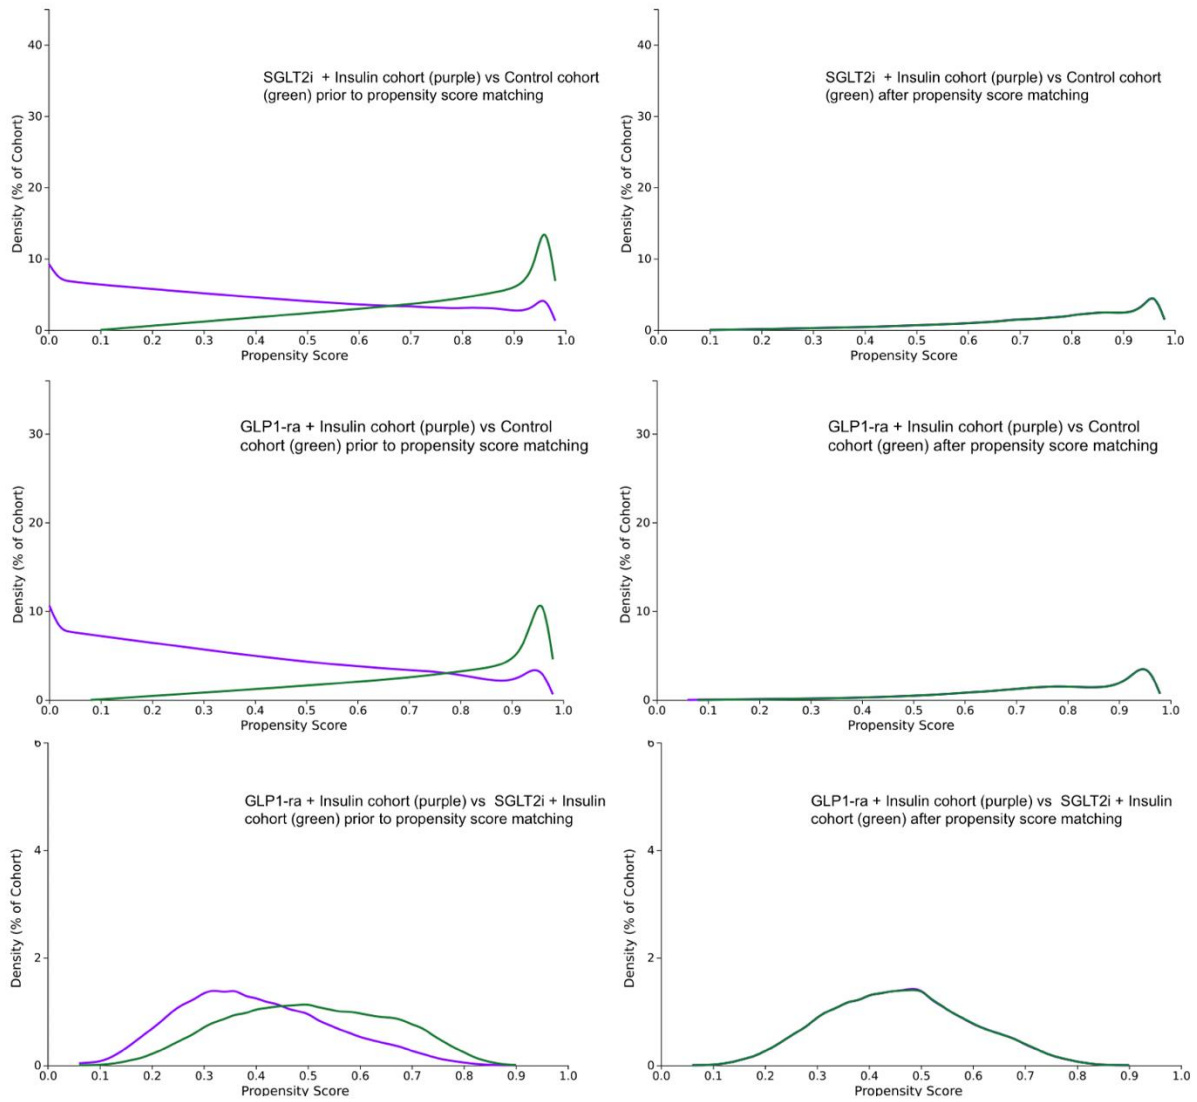

Supplementary Material Figure 2: Kaplan-Meier plots for DMO

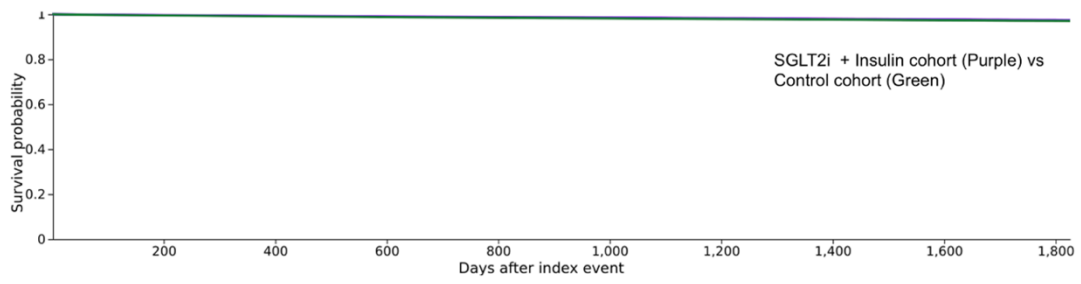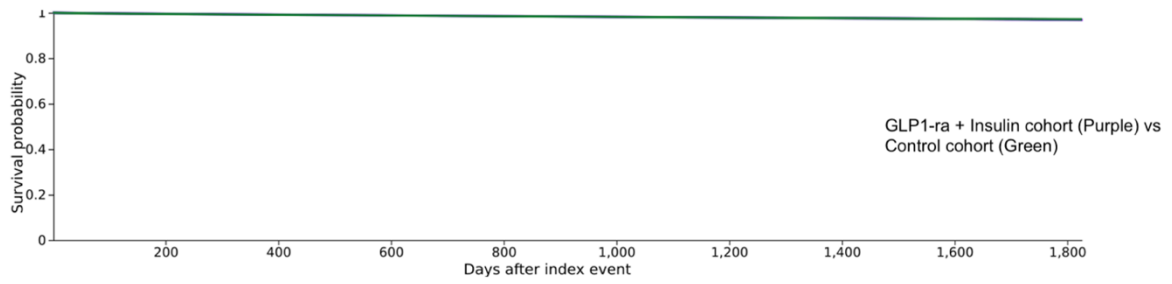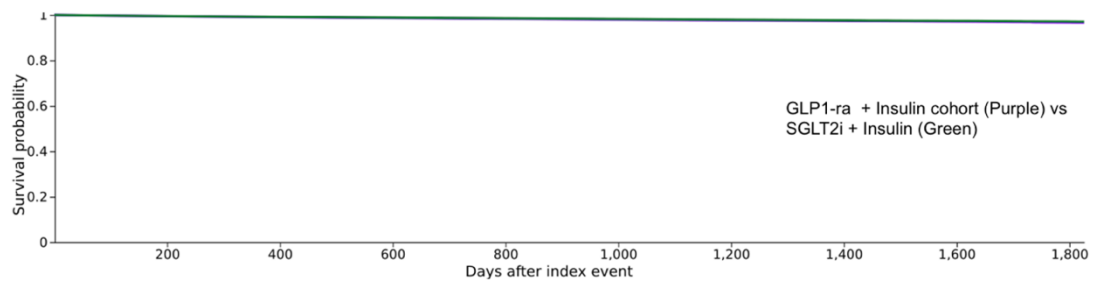



Supplementary Material Figure 3: Kaplan-Meier plots for Diabetic retinopathy

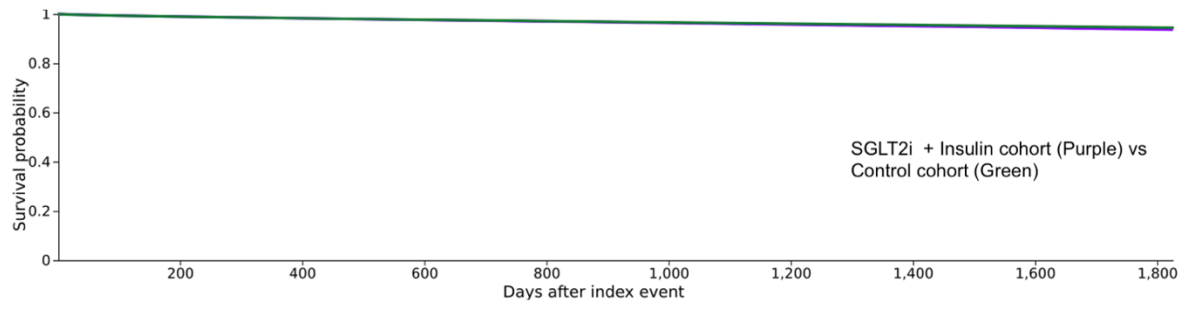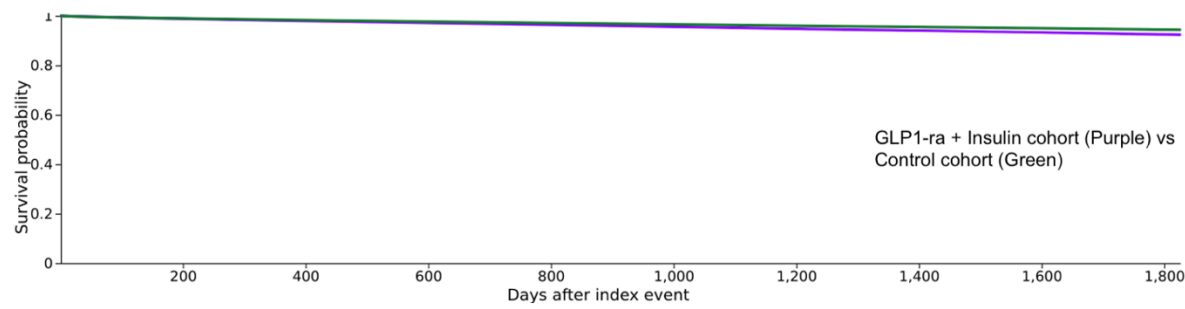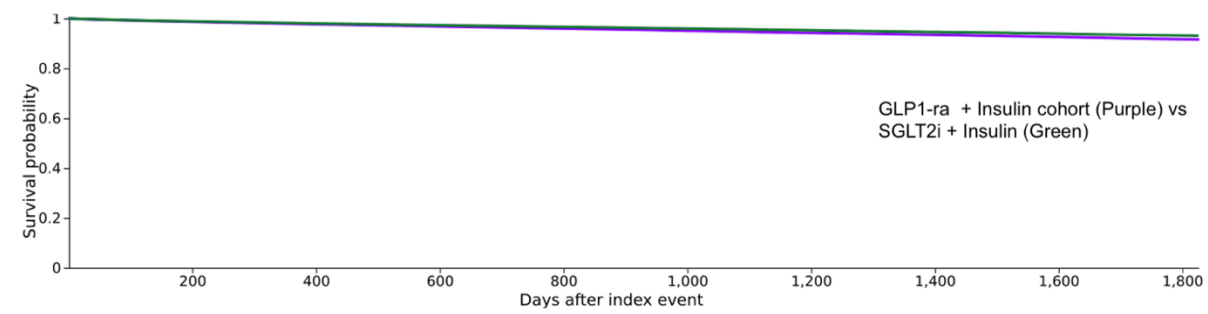

Supplement: MOESM1 [file 26955356]
